# Supplementary material for: The spectrin-based membrane skeleton is asymmetric and remodels during neural development in C. elegans
Source: Oxford University Press journal article supplement (doi:10.1242/jcs.248583), 2020-07-03
Supplement: jcs248583supp.pdf [file jcs248583supp.pdf]

# Figure S1

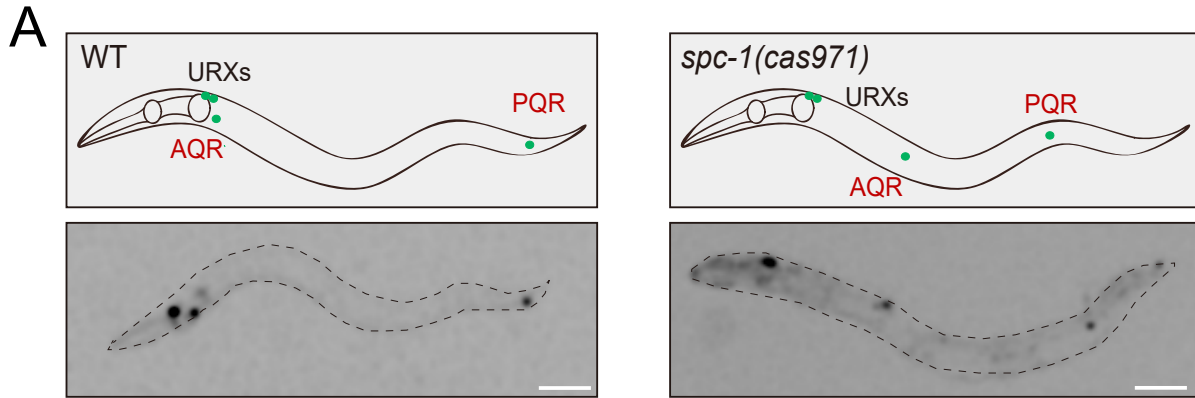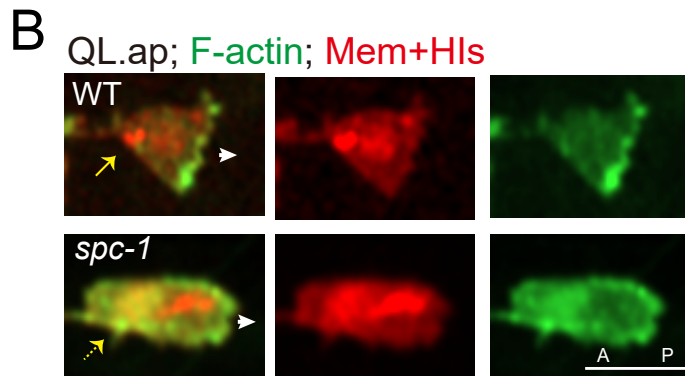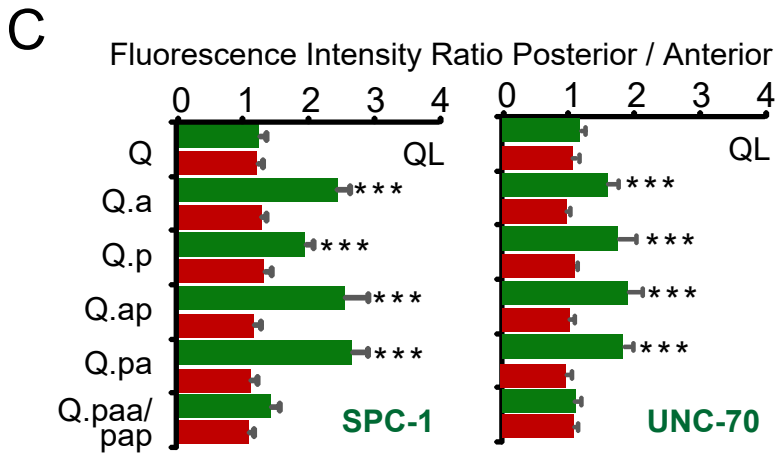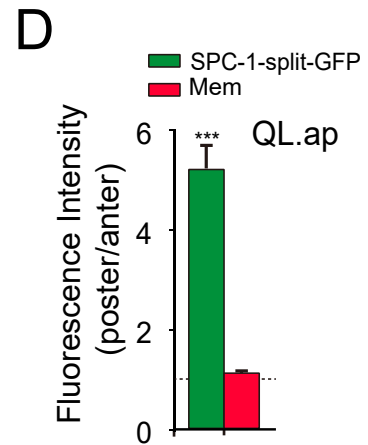

**Figure S1. (A)** Schematics (upper) and fluorescence inverted images of the A/PQR position in WT and *spc-1(cas971)* mutant animals. A/PQR neurons were visualized using *Pgcy-32::mCherry*. The image is inverted so that high mCherry fluorescence intensity is black. The cell identities are denoted adjacent to the cells. Dotted blue lines show the periphery of *C. elegans*. Scale bar, 50  $\mu\text{m}$ . **(B)** Fluorescence images of GFP-tagged F-actin (green) with mCherry (red) labeled plasma membrane and histone in QL.ap cells in WT or *spc-1(cas971)* animals. Yellow arrows show the rear of migrating cells; White arrows indicate the direction of migration. AP, anterior, and posterior. Scale bar, 5  $\mu\text{m}$ . **(C)** Quantification of the GFP (green) of SPC-1 (left) or UNC-70 (right), and mCherry (red) fluorescence intensity ratio between the posterior and the anterior plasma membrane portions in the QL cell lineages (N = 10-20 animals). Anterior and posterior were divided by a dashed line in Fig. 2A. **(D)** Quantification of the fluorescence intensity ratio of split-7xGFP-tagged SPC-1 (green), and mCherry-membrane (red) between the posterior and the anterior of the migrating QL.ap cells (N = 15 animals). The error bars indicate the standard error of the mean (SEM). Statistical significance is based on Student's *t*-test, \*\*\*  $P < 0.001$ .

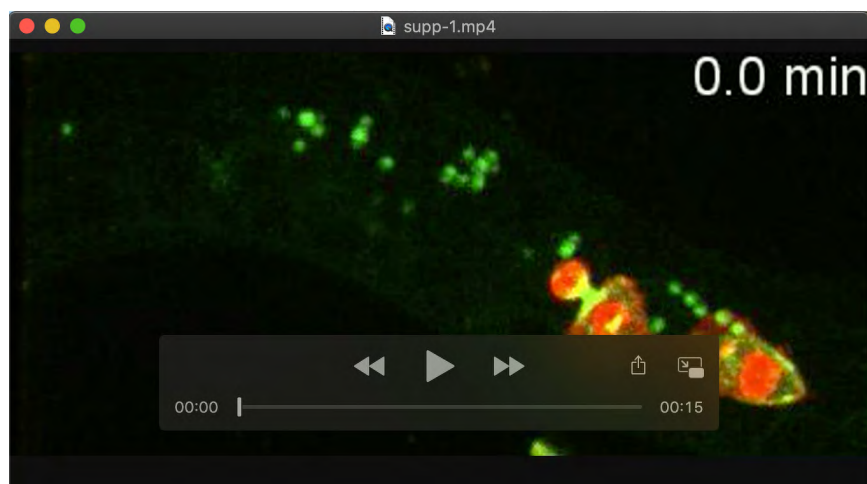

**Movie 1 is related to Figure 2. Dynamic distribution of SPC-1::7xGFP during QR.ap cell migration**

Fluorescence time-lapse movies of QR.ap cell migration with 7xGFP-tagged SPC-1 and mCherry-tagged plasma membrane in a WT animal. Frames were taken every 60 seconds. The display rate is 7 frames per second.

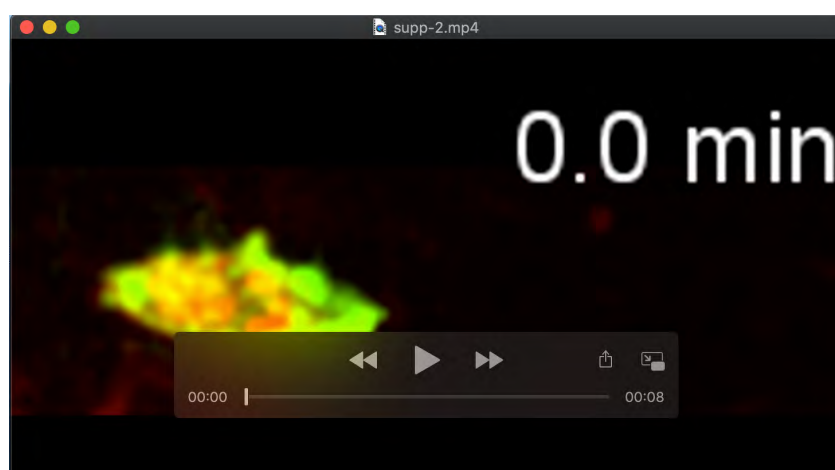

**Movie 2 is related to Figure 3. The neuritogenesis of QL.ap in WT** Fluorescence time-lapse movies of GFP-tagged F-actin and mCherry-tagged plasma membrane during QL.ap neuritogenesis, showing the transformation of the leading edge into the growth cone. Frames were taken every 60 seconds. The display rate is 7 frames per second.

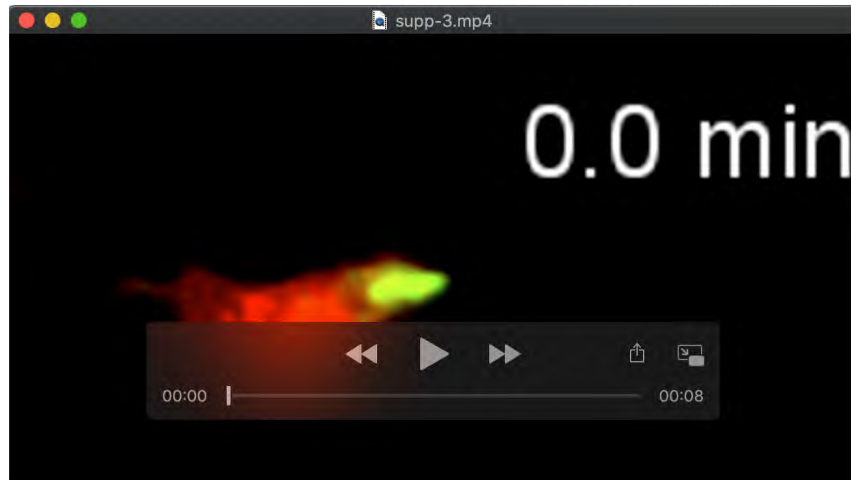

**Movie 3 is related to Figure 3. The neuritogenesis of QL.ap in *spc-1(cas971)* mutant animal**

Fluorescence time-lapse movies of GFP-tagged F-actin and mCherry-tagged plasma membrane during QL.ap neuritogenesis in *spc-1(cas971)* mutants, showing the transformation of the leading edge into the branched growth cone. Frames were taken every 60 seconds. The display rate is 7 frames per second.

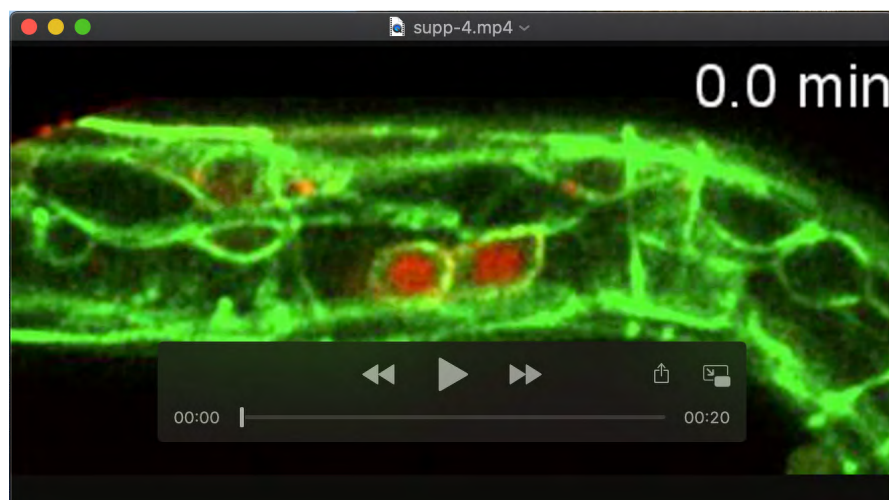

**Movie 4 is related to Figure 4. Dynamic distribution of GFP::UNC-44 during QR.a and QR.ap cell migration in the knock-in animals**

Fluorescence time-lapse movies of QR.ap cell migration with GFP-tagged UNC-44 and mCherry-tagged plasma membrane in a knock-in animal. Frames were taken every 60 seconds. The display rate is 7 frames per second.

### Supplemental Tables

| <b>Table S1 Targets of CRISPR and primers for molecular analysis</b> |                                            |                                                     |
|----------------------------------------------------------------------|--------------------------------------------|-----------------------------------------------------|
| <b>Gene</b>                                                          | <b>CRISPR-Cas9 targets (PAM)</b>           | <b>Primers (For: forward; Rev: reverse)</b>         |
| <i>spc-1 knock in</i>                                                | sg1:<br>GCGAGATTAGCTCTGGAACA<br><b>AGG</b> | For:<br>ATTAGCTCTGGAACAGTTTTAGAGCTAGAAAT<br>AGCAAG  |
|                                                                      |                                            | Rev:<br>TGTTCCAGAGCTAATCTCGCCAAGACATCTCG<br>CAATAGG |
|                                                                      | sg2:ACAATTGGCGAGATTAGCT<br><b>C TGG</b>    | For:<br>TGGCGAGATTAGCTCGTTTTAGAGCTAGAAAT<br>AGCAAG  |
|                                                                      |                                            | Rev:<br>GAGCTAATCTCGCCAATTGTCAAGACATCTCG<br>CAATAGG |
| <i>unc-70 knock in</i>                                               | sg1:CGTCGTCGGCAATATGG<br><b>CTA CGG</b>    | For:<br>TAGCCATATTGCCGACGACGCAAGACATCTCG<br>CAATAGG |
|                                                                      |                                            | Rev:<br>TCGGCAATATGGCTAGTTTTAGAGCTAGAAAT<br>AGCAAG  |
|                                                                      | sg2:<br>GCGAAACGTCGTCGGCAATA<br><b>TGG</b> | For:<br>TATTGCCGACGACGTTTCGCCAAGACATCTCG<br>CAATAGG |
|                                                                      |                                            | Rev:<br>ACGTCGTCGGCAATAGTTTTAGAGCTAGAAAT<br>AGCAAG  |
| <i>spc-1-L268P knock in</i>                                          | sg1:<br>ACTCGTAAGGAAGGGCTCTT<br><b>TGG</b> | For:<br>TAAGGAAGGGCTCTTGTTTTAGAGCTAGAAAT<br>AGCAAG  |
|                                                                      |                                            | Rev:<br>AAGAGCCCTTCCTTACGAGTCAAGACATCTCG<br>CAATAGG |
|                                                                      | sg2:<br>AAAGAGCCCTTCCTTACGAG<br><b>TGG</b> | For:<br>CTCGTAAGGAAGGGCTTTTCAAGACATCTCG<br>CAATAGG  |
|                                                                      |                                            | Rev:                                                |

|                                                 |                                                    |                                                       |
|-------------------------------------------------|----------------------------------------------------|-------------------------------------------------------|
|                                                 |                                                    | GCCCTTCCTTACGAGGTTTTAGAGCTAGAAAT<br>AGCAAG            |
| <i>unc-70-<br/>ΔH590-<br/>L598 knock<br/>in</i> | <i>sg1:</i><br>CGAGAGTAAGAAGCATATC<br><b>G TGG</b> | For:<br>CGATATGCTTCTTACTCTCGCAAGACATCTCGC<br>AATAGG   |
|                                                 |                                                    | Rev:<br>GTAAGAAGCATATCGGTTTTAGAGCTAGAAAT<br>AGCAAG    |
|                                                 | <i>sg2:</i><br>GCTTCTTACTCTCGATCTCA<br><b>TGG</b>  | For:<br>TGAGATCGAGAGTAAGAAGCCAAGACATCTC<br>GCAATAG    |
|                                                 |                                                    | Rev:<br>TACTCTCGATCTCAGTTTTAGAGCTAGAAAT<br>AGCAAG     |
| <i>unc-44<br/>knock in</i>                      | <i>sg1:</i><br>CGCCTTCGTTTCGACATGGT<br><b>CGG</b>  | For:<br>CCTTCGTTTCGACATGGTGTTTTAGAGCTAGAAA<br>TAGCAAG |
|                                                 |                                                    | Rev:<br>ATGTCGAACGAAGGCGCAAGACATCTCGCAAT<br>AGGAGGTG  |
|                                                 | <i>sg2:</i><br>CAACAACAGCCGGAGTCAC<br><b>AGG</b>   | For:<br>ACAACAGCCGGAGTCACGTTTTAGAGCTAGAA<br>ATAGCAAG  |
|                                                 |                                                    | Rev:<br>GACTCCGGCTGTTGTTGCAAGACATCTCGCAAT<br>AGGAGGTG |

**Table S2 Primers and plasmids used for plasmid cloning in this study**

| Plasmid Name                                                             | Primer 5'                                      | Primer 3'                                     | Notes                                         |
|--------------------------------------------------------------------------|------------------------------------------------|-----------------------------------------------|-----------------------------------------------|
| pDD162-Peft-3::Cas9 + PU6:: <i>spc-1</i> knock in <i>sg1</i>             | TGTTCCAGAGCTAAT<br>CTCGCCAAGACATCT<br>CGCAATAG | ATTAGCTCTGGAACA<br>GTTTTAGAGCTAGAA<br>ATAGCAA | PCR from pDD162-Peft-3::Cas9+PU6::Empty sgRNA |
| pDD162-Peft-3::Cas9 + PU6:: <i>spc-1</i> knock in <i>sg2</i>             | GAGCTAATCTCGCCA<br>ATTGTCAAGACATCT<br>CGCAATAG | TGGCGAGATTAGCTC<br>GTTTTAGAGCTAGAA<br>ATAGCAA | PCR from pDD162-Peft-3::Cas9+PU6::Empty sgRNA |
| pDD162-Peft-3::Cas9 + PU6:: <i>unc-70</i> knock in <i>sg1</i>            | TAGCCATATTGCCGA<br>CGACGCAAGACATCT<br>CGCAATA  | TCGGCAATATGGCTA<br>GTTTTAGAGCTAGAA<br>ATAGCAA | PCR from pDD162-Peft-3::Cas9+PU6::Empty sgRNA |
| pDD162-Peft-3::Cas9 + PU6:: <i>unc-70</i> knock in <i>sg2</i>            | TATTGCCGACGACGT<br>TTCGCCAAGACATCT<br>CGCAATAG | ACGTCGTCGGCAATA<br>GTTTTAGAGCTAGAA<br>ATAGCAA | PCR from pDD162-Peft-3::Cas9+PU6::Empty sgRNA |
| pDD162-Peft-3::Cas9 + PU6:: <i>spc-1-L268</i> knock in <i>sg1</i>        | AAGAGCCCTTCCTTA<br>CGAGTCAAGACATCT<br>CGCAATAG | TAAGGAAGGGCTCTT<br>GTTTTAGAGCTAGAA<br>ATAGCAA | PCR from pDD162-Peft-3::Cas9+PU6::Empty sgRNA |
| pDD162-Peft-3::Cas9 + PU6:: <i>spc-1-L268</i> knock in <i>sg2</i>        | TTCCTTACGAGTGGC<br>CGCCACAAGACATCT<br>CGCAATA  | GCCACTCGTAAGGAA<br>GTTTTAGAGCTAGAA<br>ATAGCAA | PCR from pDD162-Peft-3::Cas9+PU6::Empty sgRNA |
| pDD162-Peft-3::Cas9 + PU6:: <i>unc-70-ΔH590-L598</i> knock in <i>sg1</i> | CGATATGCTTCTTACT<br>CTCGCAAGACATCTC<br>GCAATA  | GTAAGAAGCATATCG<br>GTTTTAGAGCTAGAA<br>ATAGCAA | PCR from pDD162-Peft-3::Cas9+PU6::Empty sgRNA |

|                                                                    |                                                 |                                                             |                                                                                                                                                      |
|--------------------------------------------------------------------|-------------------------------------------------|-------------------------------------------------------------|------------------------------------------------------------------------------------------------------------------------------------------------------|
| pDD162- <i>Peft-3::Cas9 + PU6:: unc-70-ΔH590-L598 knock in sg2</i> | TGAGATCGAGAGTAA<br>GAAGCCAAGACATCT<br>CGCAATA   | TTACTCTCGATCTCAG<br>TTTTAGAGCTAGAAA<br>TAGCAAG              | PCR from pDD162- <i>Peft-3::Cas9+PU6::Empty sgRNA</i>                                                                                                |
| pPD95.77- <i>spc-1-5' arm::gfp knock in</i>                        | GAAGAGTAATTGGAC<br>CACAATGCGAGTGGC<br>GTTTC     | GTACCGGTAGAAAAA<br>GGAAGAGATCCGTGC<br>CTT                   | The 5' arm sequences were amplified from N2 and cloned into pPD95.77 via In-Fusion Advantage PCR Cloning Kit.                                        |
| pPD95.77- <i>spc-1-5' arm::gfp-3' arm knock in</i>                 | AGACCCAAGCTTGGT<br>ACCATGAGT                    | CTATTTGTATAGTTCA<br>TCCATGCC                                | The 3' arm sequences were amplified from N2 and cloned into pPD95.77- <i>spc-1-5' arm::gfp</i> knock in via In-Fusion Advantage PCR Cloning Kit.     |
| pPD95.77- <i>unc-70-5' arm::gfp knock in</i>                       | GAAGAGTAATTGGAC<br>CAGACGTTCCCGGA<br>AAGAAGTGGC | GTACCGGTAGAAAAA<br>CCACCCATCACTCTCT<br>CGTAACCTC            | The 5' arm sequences were amplified from N2 and cloned into pPD95.77 via In-Fusion Advantage PCR Cloning Kit.                                        |
| pPD95.77- <i>unc-70-5' arm::gfp-3' arm knock in</i>                | GGAAGTGGTAGCGGT<br>ATGGCTACGGTGAGT<br>TTTTT     | ATGAGTAAAGGAGAA<br>GAACTTTTC                                | The 3' arm sequences were amplified from N2 and cloned into pPD95.77- <i>unc-70-1-5' arm::gfp knock in</i> via In-Fusion Advantage PCR Cloning Kit.  |
| pPD95.77- <i>spc-1-5' arm::7×gfp11 knock in</i>                    | GAAGAGTAATTGGAC<br>CACAATGCGAGTGGC<br>GTTTC     | <sup>5</sup><br>GTACCGGTAGAAAAA<br>GGAAGAGATCCGTGC<br>CTTGC | The 5' arm sequences were amplified from N2 and cloned into pPD95.77 via In-Fusion Advantage PCR Cloning Kit.                                        |
| pPD95.77- <i>spc-1-5' arm::7×gfp11-3' arm knock in</i>             | GGTGATACCGGCAGC<br>ATTGACATATTCG                | ATGCGTGACCACATG<br>GTCCTTCATGA                              | The 3' arm sequences were amplified from N2 and cloned into pPD95.77- <i>spc-1-5' arm::7×gfp11</i> knock in via In-Fusion Advantage PCR Cloning Kit. |
| pPD95.77- <i>spc-1-L268P arm knock in</i>                          | GAACGAGTCAGCACG<br>AGCATCAAT                    | GCCCTCTGGGATAAG<br>CTCTTCTTCAAAGT                           | The <i>spc-1</i> sequences were amplified from N2 and cloned into pPD95.77 via In-Fusion Advantage PCR Cloning Kit.                                  |
| pPD95.77- <i>spc-1-L268P knock in repair template</i>              | CCAAATGGCCCTTCC<br>TTACGAGTGGCCGCC<br>AAAGT     | GGAAGGGCCATTTGG<br>AGCTCATCAAGTTCA<br>ACGCT                 | PCR on pPD95.77- <i>spc-1-L268P</i> knock in repair template                                                                                         |
| pPD95.77- <i>unc-70-ΔH590-L598 arm knock in</i>                    | GCATGGCAATCCCTT<br>GAGAAGGCAGAACA<br>CGAAC      | GAAGAGTAATTGGAC<br>TGGCTCTTCTCTGAG<br>GCAAC                 | The <i>unc-70</i> sequences were amplified from N2 and cloned into pPD95.77 via In-Fusion Advantage PCR Cloning Kit.                                 |



|                                                                                 |                                                  |                                                  |                                                                                                                            |
|---------------------------------------------------------------------------------|--------------------------------------------------|--------------------------------------------------|----------------------------------------------------------------------------------------------------------------------------|
| pPD95.77- <i>unc-70</i><br><i>ΔH590-L598 knock in</i><br><i>repair template</i> | ATGAGATCCATTGAC<br>AACTCCAATCGAACT<br>CTGCG      | GTCAATGGATCTCAT<br>GGATGATATTAAGAG<br>CAGAC      | PCR on pPD95.77- <i>unc-70-ΔH590-L598</i> arm knock in                                                                     |
| pPD95.77- <i>Pegl-17::gfp-10</i>                                                | CCCGAAATGTGAGCT<br>ATGTCCAAAGGAGAA<br>GAACTG     | GAAGAGTAATTGGAC<br>CTAACTTCCGCCGCC<br>ACCTGTTCC  | The <i>gfp<sub>1-10</sub></i> sequences were cloned into pPD95.77- <i>Pegl-17</i> via In-Fusion Advantage PCR Cloning Kit. |
| pPD95.77- <i>unc-44-HR</i><br><i>arm knock in</i>                               | GTACCGGTAGAAAAA<br>CCACCTAGTCCTCTAC<br>ATCTCATC  | GAAACGCGCGAGAC<br>GCATGTCCATAATGGG<br>CTGC       | The HR arm sequences were amplified from N2 and cloned into pPD95.77 via In-Fusion Advantage PCR Cloning Kit.              |
| pPD95.77- <i>unc-44-5'</i><br><i>arm::gfp-3' arm knock</i><br><i>in</i>         | GGAGCTAGTGGTAGC<br>TCGAACGAAGGCGAT<br>CCA        | TTCTCCTTTACTCATG<br>TTAGATGTTAGTCCTG<br>C        | The <i>gfp</i> sequences were cloned into pPD95.77- <i>unc-44-HR arm knock in</i> via In-Fusion Advantage PCR Cloning Kit. |
| pDD162- <i>Phsp-16.2::Cas9+PU6::spc-1-T1</i><br><i>sgRNA</i>                    | TCATGCTCCACCAGA<br>GCGTTTTAGAGCTAG<br>AAATAGC    | TCTGGTGGAGCATGA<br>GTGCAAGACATCTCG<br>CAATAGGAGG | PCR from pDD162- <i>Phsp-16.2::Cas9+PU6::Empty</i><br><i>sgRNA</i>                                                         |
| pDD162- <i>Phsp-16.2::Cas9+PU6::spc-1-T2</i><br><i>sgRNA</i>                    | AAAACGAGATCGTCT<br>CGGTTTTAGAGCTAG<br>AAATAGC    | AGACGATCTCGTTTT<br>GTCCAAGACATCTCG<br>CAATAGGAGG | PCR from pDD162- <i>Phsp-16.2::Cas9+PU6::Empty</i><br><i>sgRNA</i>                                                         |
| pDD162- <i>Phsp-16.2::Cas9+PU6::unc-44-T1</i><br><i>sgRNA</i>                   | TCCAGCTGCTCCGGA<br>ACCGTTTTAGAGCTA<br>GAA ATA GC | TTCCGGAGCAGCTGG<br>AGCCAAGACATCTCG<br>CAATAGGA   | PCR from pDD162- <i>Phsp-16.2::Cas9+PU6::Empty</i><br><i>sgRNA</i>                                                         |
| pDD162- <i>Pegl-17::Cas9+PU6::spc-1-T1</i><br><i>sgRNA</i>                      | TCATGCTCCACCAGA<br>GCGTTTTAGAGCTAG<br>AAATAGC    | TCTGGTGGAGCATGA<br>GTGCAAGACATCTCG<br>CAATAGGAGG | PCR from pDD162- <i>Pegl-17::Cas9+PU6::Empty</i><br><i>sgRNA</i>                                                           |
| pDD162- <i>Pegl-17::Cas9+PU6::spc-1-T2</i><br><i>sgRNA</i>                      | AAAACGAGATCGTCT<br>CGGTTTTAGAGCTAG<br>AAATAGC    | AGACGATCTCGTTTT<br>GTCCAAGACATCTCG<br>CAATAGGAGG | PCR from pDD162- <i>Pegl-17::Cas9+PU6::Empty</i><br><i>sgRNA</i>                                                           |

| <b>Table S3. <i>C. elegans</i> strains used in this study</b> |                                                                                                                                      |                |                 |
|---------------------------------------------------------------|--------------------------------------------------------------------------------------------------------------------------------------|----------------|-----------------|
| <b>Strain name</b>                                            | <b>Genotype</b>                                                                                                                      | <b>Method</b>  | <b>Resource</b> |
| N2                                                            | Wild type                                                                                                                            | -              | CGC             |
| GOU2936                                                       | <i>cas815[spc-1::gfp knock in]</i>                                                                                                   | Microinjection | This study      |
| GOU3238                                                       | <i>cas971[spc-1-L260P knock in]</i>                                                                                                  | Microinjection | This study      |
| GOU3519                                                       | <i>cas1047[spc-1::7×gfp11 knock in]</i>                                                                                              | Microinjection | This study      |
| GOU3617                                                       | <i>cas1047[spc-1::7×gfp11 knock in]; casEx5751[Pegl-17::gfp1-10,pRF4(+)]</i>                                                         | Genetic cross  | This study      |
| GOU3103                                                       | <i>cas962[gfp::unc-70 knock in]</i>                                                                                                  | Microinjection | This study      |
| GOU3237                                                       | <i>cas983[unc-70-ΔH590-L598 knock in]</i>                                                                                            | Microinjection | This study      |
| GOU2039                                                       | <i>cas963[gfp::unc-44 knock in]</i>                                                                                                  | Microinjection | This study      |
| GOU3659                                                       | <i>cas963[gfp::unc-44 knock in]; cas961[spc-1::rfp knock in]</i>                                                                     | Genetic cross  | This study      |
| GOU174                                                        | <i>casIs35[Pgcy-32::mCherry, unc-76(+)] ;<br/>zdis5[Pmec-4::gfp, lin-15(+)]</i>                                                      | Genetic cross  | This study      |
| GOU3648                                                       | <i>casEx5752[Pegl-17::Cas9+PU6::spc-1-sg2,pRF4 ] ;<br/>casIs35[Pgcy-32::mCherry, unc-76(+)] ;<br/>zdis5[Pmec-4::gfp, lin-15(+)]</i>  | Microinjection | This study      |
| GOU3649                                                       | <i>casEx5753[Phsp16.2::Cas9+PU6::spc-1-sg1,pRF4 ] ;<br/>casIs35[Pgcy-32::mCherry, unc-76(+)] ;<br/>zdis5[Pmec-4::gfp, lin-15(+)]</i> | Microinjection | This study      |
| GOU3651                                                       | <i>casEx5754[Phsp16.2::Cas9+PU6::spc-1-sg2,pRF4 ] ;<br/>casIs35[Pgcy-32::mCherry, unc-76(+)] ;<br/>zdis5[Pmec-4::gfp, lin-15(+)]</i> | Microinjection | This study      |
| GOU3072                                                       | <i>cas971[spc-1-L260P knock in]; casIs35[Pgcy-32::mCherry, unc-76(+)] ; zdis5[Pmec-4::gfp, lin-15(+)]</i>                            | Genetic cross  | This study      |

|         |                                                                                                                                                        |               |            |
|---------|--------------------------------------------------------------------------------------------------------------------------------------------------------|---------------|------------|
| GOU3079 | <i>unc-44(e362); casIs35[Pgcy-32::mCherry, unc-76(+)]; zdIs5[Pmec-4::gfp, lin-15(+)]</i>                                                               | Genetic cross | This study |
| GOU4190 | <i>unc-44(e362); casEx5752[Pegl-17::Cas9+PU6::spc-1-sg2,pRF4 ]; casIs35[Pgcy-32::mCherry, unc-76(+)]; zdIs5[Pmec-4::gfp, lin-15(+)]</i>                | Genetic cross | This study |
| GOU2937 | <i>cas815[spc-1::gfp knock in]; casIs165[Pegl-17:: myri-mCherry, Pegl-17::mCherry-TEV-S::his-24, unc-76(+)]</i>                                        | Genetic cross | This study |
| GOU4191 | <i>cas962[gfp::unc-70 knock in]; casIs165[Pegl-17:: myri-mCherry, Pegl-17::mCherry-TEV-S::his-24, unc-76(+)]</i>                                       | Genetic cross | This study |
| GOU3065 | <i>cas963[gfp::unc-44 knock in]; casIs165[Pegl-17:: myri-mCherry, Pegl-17::mCherry-TEV-S::his-24, unc-76(+)]</i>                                       | Genetic cross | This study |
| GOU1544 | <i>casIs165[Pegl-17:: myri-mCherry, Pegl-17::mCherry-TEV-S::his-24, unc-76(+)]; casIs555[Pegl-17::gfp::moesinABD]</i>                                  | Genetic cross | This study |
| GOU3676 | <i>cas971[spc-1-L260P knock in]; casIs165[Pegl-17:: myri-mCherry, Pegl-17::mCherry-TEV-S::his-24, unc-76(+)] II; casIs555[Pegl-17::gfp::moesinABD]</i> | Genetic cross | This study |
| GOU1409 | <i>unc-44(e362); mnIs17[osm-6::gfp]</i>                                                                                                                | Genetic cross | This study |
| GOU2035 | <i>casEx2000[Phsp-16.2::Cas9+PU6::unc-44-T3 sgRNA; Podr-1::dsRed; ]; mnIs17[osm-6::gfp]</i>                                                            | Genetic cross | This study |

**Table S4**

Protein identified from SPC-1::GFP affinity purification and mass spectrometry analysis

[Click here to Download Table S4](#)
